# Supplementary material for: Light harvesting and energy transfer in a porphyrin-based metal organic framework
Source: Royal Society of Chemistry journal article supplement (doi:10.1039/c8fd00194d), 2018-12-18
Supplement: c8fd00194d1.pdf [file c8fd00194d1.pdf]

## Supplementary information for

# Light Harvesting and Energy Transfer in a Porphyrin-based Metal Organic

## Framework

Shaunak M. Shaikh<sup>a</sup>, Arnab Chakraborty<sup>a</sup>, James Alatis<sup>a</sup>, Meng Cai<sup>a</sup>, Evgeny Danilov<sup>b</sup>, Amanda J. Morris<sup>a\*</sup>

Department of Chemistry and Macromolecules Innovation Institute, Virginia Tech, Blacksburg, Virginia 24061, United States

## Table of Contents

|                                                                                 |   |
|---------------------------------------------------------------------------------|---|
| 1. Thermogravimetric analysis.....                                              | 2 |
| 2. Nitrogen gas adsorption isotherm.....                                        | 4 |
| 3. Acid-base titration curves of TCPP and PCN-223(fb).....                      | 4 |
| 4. Absorption data for TCPP and PCN-223(fb).....                                | 5 |
| 5. Determination of $[HP^{2+}]/[P]$ in TCPP solutions and MOF suspensions.....  | 5 |
| 6. Emission spectra of TCPP and PCN-223 as a function of temperature.....       | 6 |
| 7. Spectral overlap integral calculation.....                                   | 6 |
| 8. Quantum yield calculation .....                                              | 7 |
| 9. Center-to-Center donor-acceptor distance in PCN-223 framework.....           | 7 |
| 10. Transient absorption difference spectra of TCPP and PCN-223.....            | 8 |
| 11. Comparison between nanosecond TA and femtosecond TA difference spectra..... | 9 |
| 12. Kinetic analysis of ultrafast data .....                                    | 9 |

## 1. Thermogravimetric analysis

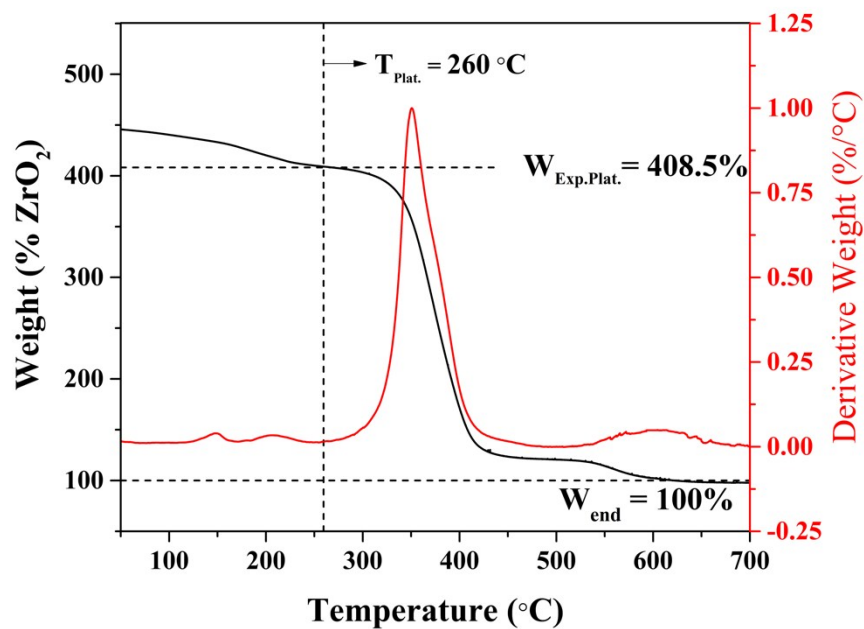

Figure S1. TGA plot of PCN-223(fb)

The reaction for the complete combustion of ideal (defect-free), hydroxylated PCN-223 MOF is-

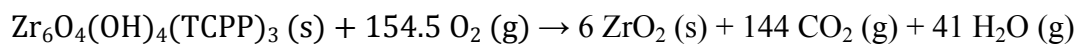

$$\frac{\text{moles of } \text{Zr}_6\text{O}_4(\text{OH})_4(\text{TCPP})_3}{\text{moles of } \text{ZrO}_2} = \frac{1}{6}$$

$$\text{moles of } \text{Zr}_6\text{O}_4(\text{OH})_4(\text{TCPP})_3 = \frac{\text{moles of } \text{ZrO}_2}{6}$$

$$\left( \frac{W_{TGA \text{ plateau}}}{W_{\text{end}}} \right)_{\text{theoretical}} = \frac{MW_{\text{Zr}_6\text{O}_4(\text{OH})_4(\text{TCPP})_3}}{6 \times MW_{\text{ZrO}_2}}$$

$$\left( \frac{W_{TGA \text{ plateau}}}{W_{\text{end}}} \right)_{\text{theoretical}} = \frac{3039.57}{6 \times 123.22}$$

$$\left( \frac{W_{TGA \text{ plateau}}}{W_{\text{end}}} \right)_{\text{theoretical}} = 4.11$$

If the end weight of the TGA run is normalized to 100%, then for hydroxylated, defect-free, solvent-free PCN-223 material, the experimental TGA plateau should be found at 411% on the TGA curve. By using the experimental  $\left(\frac{W_{TGA\ plateau}}{W_{end}}\right)$  ratio, the effective molecular weight of a MOF can be calculated,

$$MW_{effective} = \left(\frac{W_{TGA\ plateau}}{W_{end}}\right)_{experimental} \times 6 \times MW_{ZrO_2}$$

For PCN-223,  $\left(\frac{W_{TGA\ plateau}}{W_{end}}\right)_{experimental} = \mathbf{4.085}$

$$MW_{effective} = 4.085 \times 6 \times 123.2 = 3019.6$$

The general molecular formula for a hydroxylated PCN-223 MOF in which modulator loss has not occurred is  $Zr_6O_4(OH)_4(TCPP)_x(Mod)_{([Mod]/[Ligand])x}$ . The value of x in this formula can be determined by,

$$x = \frac{MW_{effective} - 547.2 - 64 - 68}{786.79 + MW_{Modulator} \times ([Mod]/[Ligand])}$$

The modulator to ligand molar ratio in the framework ( $[Mod]/[Ligand]$ ) for PCN-223 was found to be 1.48 (from  $^1H$  NMR analysis).

$$x = \frac{3019.6 - 547.2 - 64 - 68}{786.79 + (74.08 \times 1.48)} = \mathbf{2.61}$$

The resulting molecular formula of the MOF is  $Zr_6O_4(OH)_4(TCPP)_{2.61}(Mod)_{3.84}$

Propionic acid (PA) is the modulator used in the synthesis. Therefore, the molecular formula of MOF is  $Zr_6O_4(OH)_4(TCPP)_{2.61}(PA)_{3.84}$

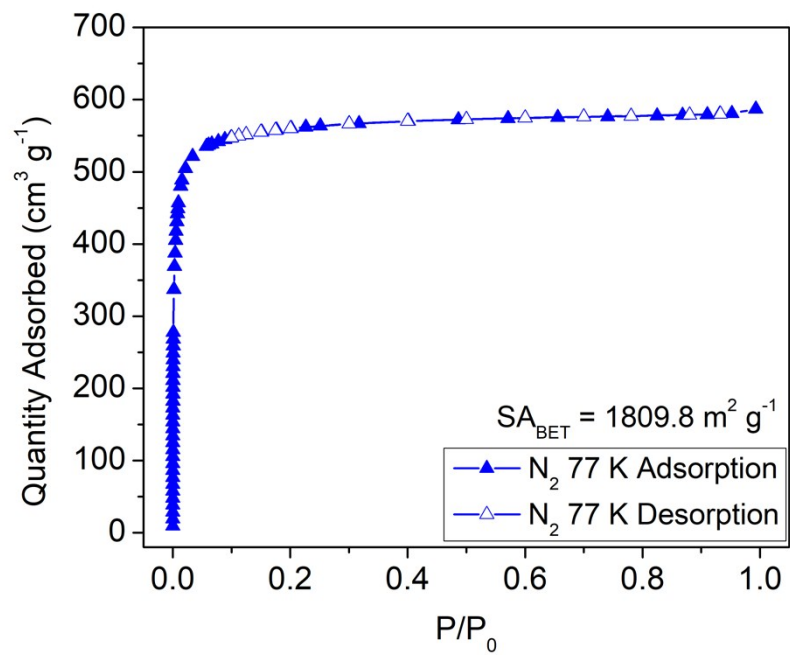

## 2. Nitrogen gas adsorption isotherm

Figure S2. N<sub>2</sub> gas adsorption isotherm of PCN-223(fb)

The BET surface area of the MOF was found to be 1809.8 m<sup>2</sup> g<sup>-1</sup>.

## 3. Acid-base titration curves of TCPP and PCN-223(fb)

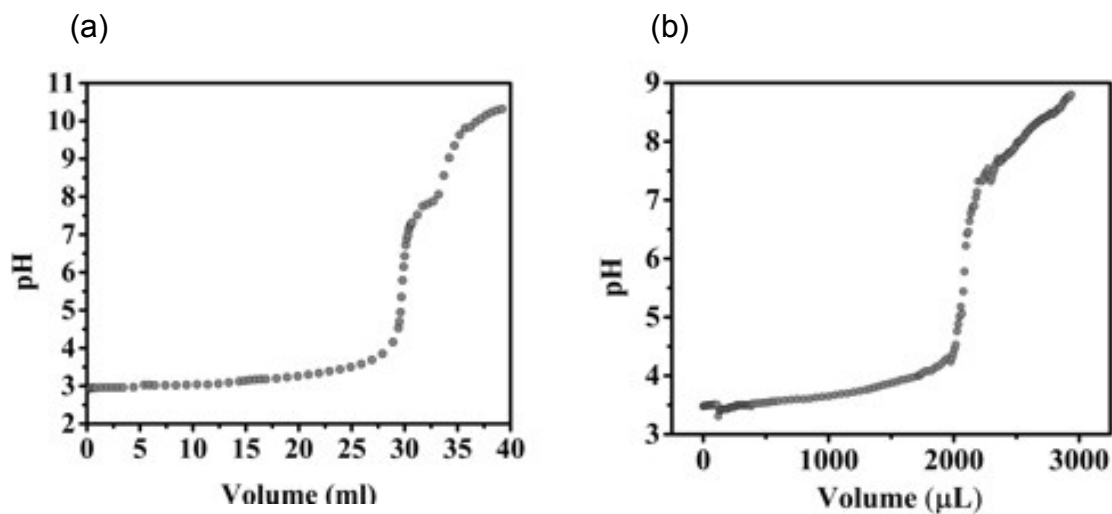

**Figure S3.** (a) Titration curve of TCPP in water ( $10^{-6}$ M) against 0.01 M NaOH solution. The first and second equivalence points of titration are around pH 5.54 and 7.5 respectively (b) Titration curve of PCN-223(fb) in water against 0.01 M NaOH solution. The equivalence point of titration is around pH 5.70.

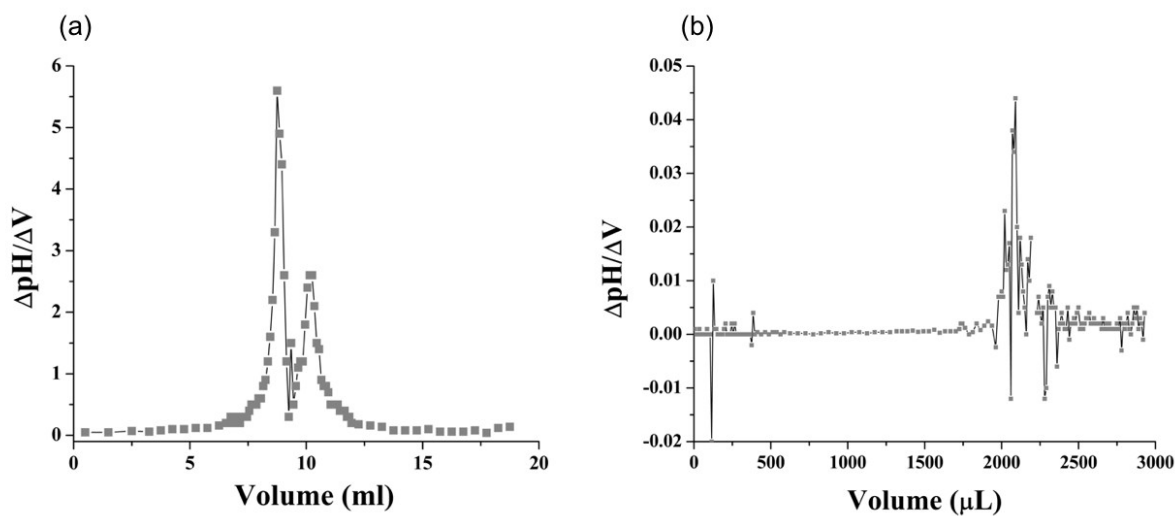

**Figure S4.** (a) First derivative of the titration curve for TCPP as a function of volume of titrant (b) First derivative of the titration curve for PCN-223(fb) as a function of volume of titrant.

#### 4. Absorption data for TCPP and PCN-223(fb)

**Table 1.** Positions of Soret (B) band and Q bands in the diffused absorption spectra of TCPP and PCN-223(fb)

|  | B(Soret) | $Q_y(1,0)$ | $Q_y(0,0)$ | $Q_x(1,0)$ | $Q_x(0,0)$ |
|--|----------|------------|------------|------------|------------|
|  |          |            |            |            |            |

|             |       |       |       |       |       |
|-------------|-------|-------|-------|-------|-------|
| TCPP        | 425nm | 525nm | 561nm | 597nm | 652nm |
| PCN-223(fb) | 412nm | 524nm | 561nm | 595nm | 652nm |

## 5. Determination of $[\text{HP}^{2+}]/[\text{P}]$ in TCPP solutions and MOF suspensions

The ratio of the concentration of protonated porphyrins to that of neutral porphyrins in TCPP solutions and MOF suspensions was determined using Henderson-Hasselbalch equation.

$$\text{pH} = \text{pK}_a + \log_{10}([\text{P}]/[\text{HP}^{2+}])$$

$$[\text{P}]/[\text{HP}^{2+}] = 10^{\text{pH} - \text{pK}_a}$$

$$[\text{HP}^{2+}]/[\text{P}] = \frac{1}{10^{(\text{pH} - \text{pK}_a)}}$$

## 6. Emission spectra of TCPP and PCN-223 as a function of temperature

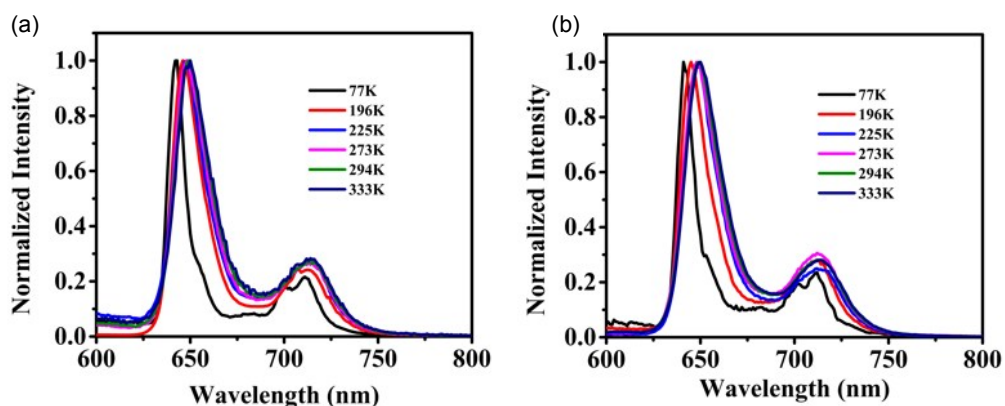

**Figure S5.** (a) Steady-state emission spectra of TCPP as a function of temperature (b) Steady-state emission spectra of PCN-223(fb) as a function of temperature.

## 7. Spectral overlap integral calculation

$$J(\lambda) = \int_0^{\infty} \varepsilon_A(\lambda) \lambda^4 F_D(\lambda) d\lambda$$

where  $\varepsilon_A$  is the extinction coefficient spectrum of the acceptor in units of  $M^{-1}cm^{-1}$ ,  $\lambda$  is the wavelength in nm and  $F_D$  is the wavelength dependent donor emission spectrum normalized to

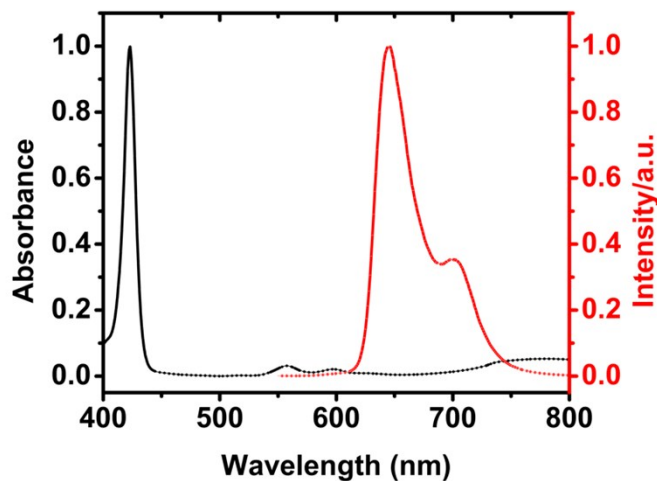

an area of 1.

**Figure S6.** Spectral overlap between the absorption spectrum of protonated TCPP (acceptor) and emission spectrum of neutral TCPP (donor)

The spectral overlap integral was estimated to be  $5.344 \times 10^{-14} M^{-1}cm^3$ .

### 8. Quantum yield calculation

The relative quantum yield of donor (neutral TCPP) in the absence of acceptor (protonated TCPP) was calculated using,

$$\frac{Q}{Q_R} = \frac{I}{I_R} \times \frac{OD_R}{OD} \times \frac{\eta^2}{\eta_R^2}$$

where Q is the quantum yield, I is the integrated intensity,  $\eta$  is the refractive index, and OD is the optical density. The subscript R refers to the reference fluorophore of known quantum yield.

Quantum yield of neutral TCPP in methanol (reference) = 0.09.

Quantum yield of neutral TCPP (in water) was estimated to be  $0.27 \pm 0.035$ .

**9. Center-to-Center donor-acceptor distance in PCN-223 framework (10.715 Å)**

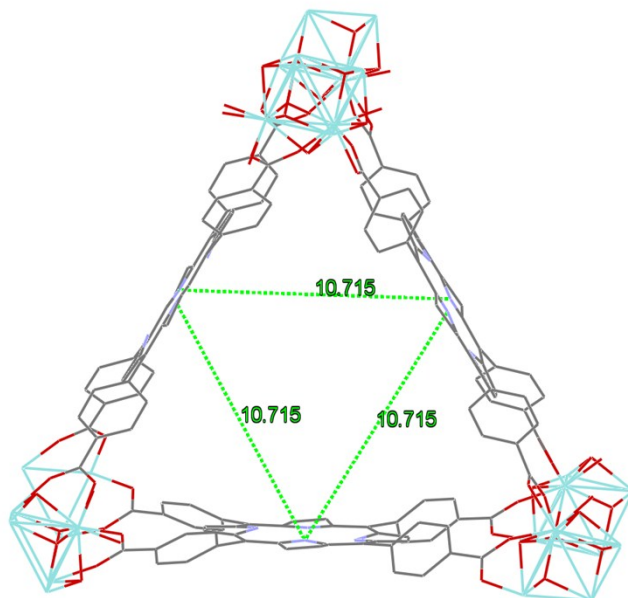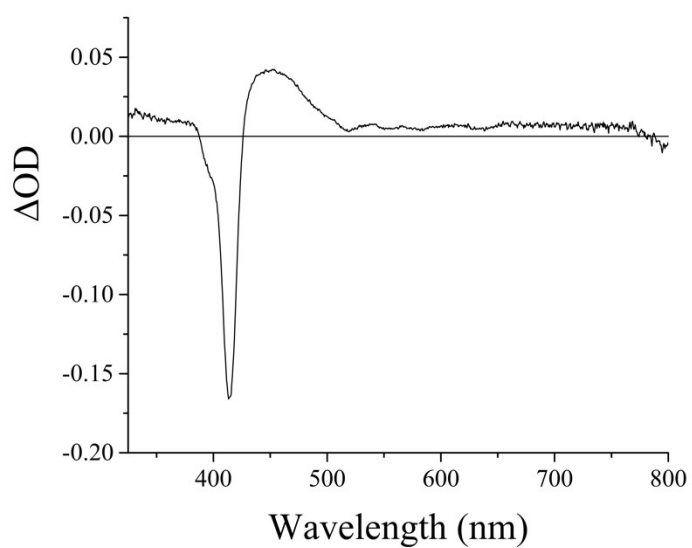

**10. (a) Transient absorption difference spectra of TCPP**



## (b) Transient absorption difference spectra of PCN-223

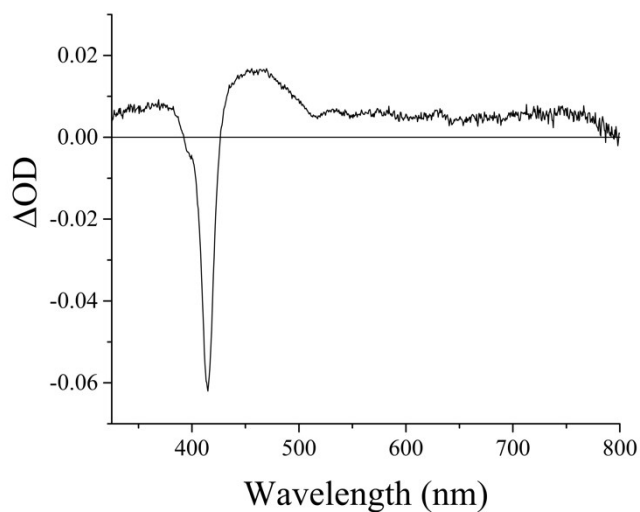

**Figure S8.** Transient absorption difference spectra of (a) TCPP and (b) PCN-223(fb) measured in degassed water at room temperature following 532 nm pulsed laser excitation (4-5 mJ/pulse, 5-7 ns fwhm). Both difference spectra represent an average of 30 transients.

## 11. Comparison between nanosecond TA and femtosecond TA difference spectra

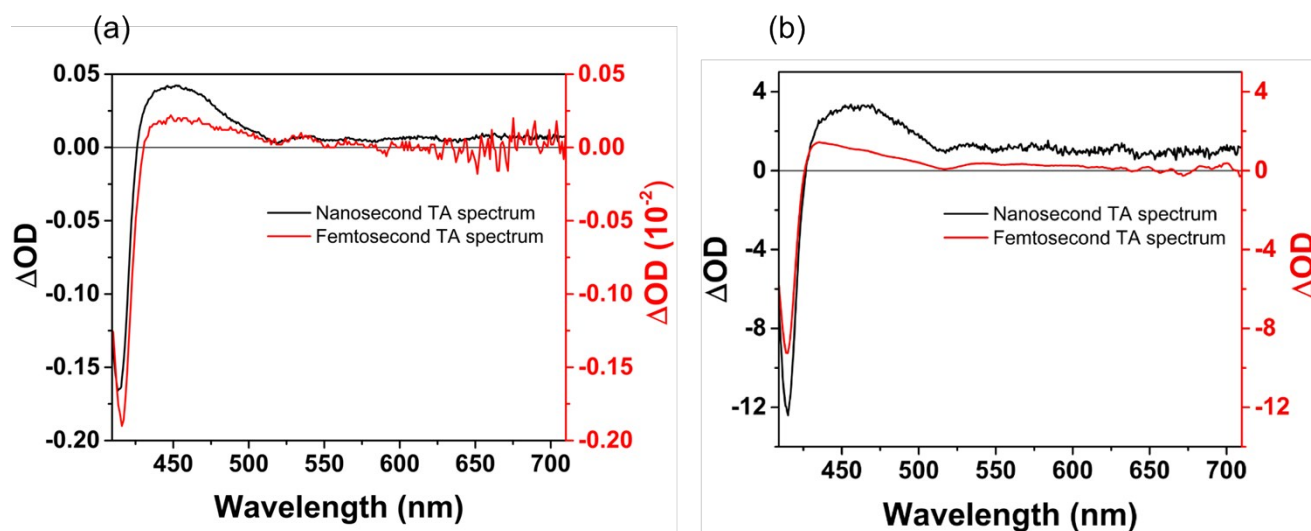

**Figure S9.** Comparison between the femtosecond TA (at a time delay of 5.5 ns) and nanosecond TA difference spectra (collected promptly after laser excitation) of (a) TCPP and (b) PCN-223(fb).

## 12. Kinetic analysis of the ultrafast data

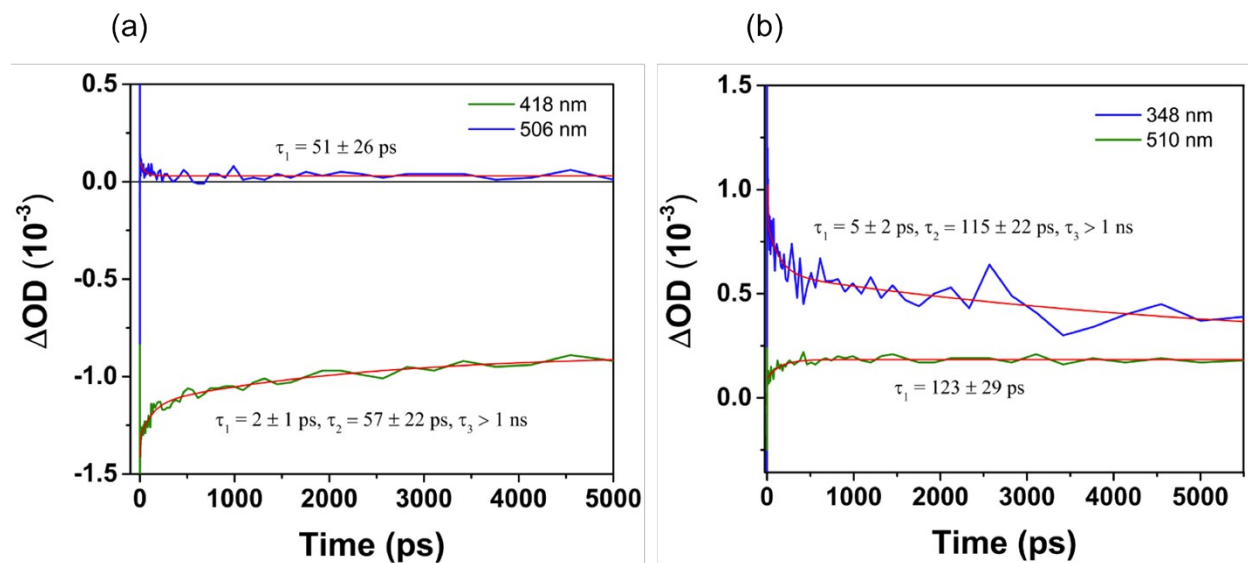

**Figure S10.** Transient absorption kinetic traces of (a) TCPP in 1:1 water-ethanol (v/v) mixture (pH-8) and (b) PCN-223(fb) in water (pH-8) following 400 nm pulsed laser excitation (140 fs fwhm) at probe wavelengths indicated in the legend. Time components of the kinetic traces obtained from fitting are shown in the figure.
